# Supplementary material for: Performance of Single-Nucleotide Polymorphisms in Breast Cancer Risk Prediction Models: A Systematic Review and Meta-analysis
Source: Oxford University Press journal article supplement (doi:10.1158/1055-9965.epi-18-0810), 2018-12-18

## ONLINE SUPPLEMENTARY MATERIAL

Table S1. Search terms applied to each database

| Database | Search Strategy                                                                                                                                                                                                                                                                                                                                                                                                                                                                                                                                                                                                                                                                                                                                                                                                                                                                             |
|----------|---------------------------------------------------------------------------------------------------------------------------------------------------------------------------------------------------------------------------------------------------------------------------------------------------------------------------------------------------------------------------------------------------------------------------------------------------------------------------------------------------------------------------------------------------------------------------------------------------------------------------------------------------------------------------------------------------------------------------------------------------------------------------------------------------------------------------------------------------------------------------------------------|
| PubMed   | ("breast neoplasms"[MeSH Terms] OR ("breast"[All Fields] AND "neoplasms"[All Fields]) OR "breast neoplasms"[All Fields] OR ("breast"[All Fields] AND "cancer"[All Fields]) OR "breast cancer"[All Fields] OR "breast tumour"[All Fields] OR "breast malignancy"[All Fields]) AND (("polymorphism, single nucleotide"[MeSH Terms] OR ("polymorphism"[All Fields] AND "single"[All Fields] AND "nucleotide"[All Fields]) OR "single nucleotide polymorphism"[All Fields] OR ("single"[All Fields] AND "nucleotide"[All Fields] AND "polymorphism"[All Fields])) OR "snp"[All Fields] OR "snps"[All Fields] OR (common[All Fields] AND "genetic"[All Fields] AND variant[All Fields])) AND (((("risk"[MeSH Terms] OR "risk"[All Fields]) AND prediction[All Fields] AND model[All Fields]) OR (("risk"[MeSH Terms] OR "risk"[All Fields]) AND prediction[All Fields]) OR polygenic risk score) |
| EMBASE   | 'risk prediction model' OR 'risk prediction' AND ('single nucleotide polymorphism' OR 'common genetic variant' OR 'genetic variants' OR 'snp' OR 'single-nucleotide polymorphism' OR 'polygenic risk score' OR 'polygenetic risk score') AND ('breast cancer' OR 'breast tumour' OR 'breast malignan*' OR 'breast neoplasm*')                                                                                                                                                                                                                                                                                                                                                                                                                                                                                                                                                               |
| SCOPUS   | (TITLE-ABS-KEY ( <b>breast cancer</b> ) OR TITLE-ABS-KEY ( breast tumour) OR TITLE-ABS-KEY ( breast malignan* )) AND TITLE-ABS-KEY ( <b>risk prediction model</b> ) AND (TITLE-ABS-KEY ( <b>single nucleotide polymorphism*</b> ) OR TITLE-ABS-KEY ( <b>polygenic risk score</b> ) OR TITLE-ABS-KEY ( <b>common genetic variant*</b> ) OR TITLE-ABS-KEY ( polygenetic risk score))                                                                                                                                                                                                                                                                                                                                                                                                                                                                                                          |

Table S2a. 25-item “Strengthening the Reporting of Genetic Risk Prediction Studies (GRIPS)” checklist\*

| TITLE & ABSTRACT                  |     |                                                                                                                                                                                                                                                                                                                              |
|-----------------------------------|-----|------------------------------------------------------------------------------------------------------------------------------------------------------------------------------------------------------------------------------------------------------------------------------------------------------------------------------|
|                                   | 1   | (a) Identify the article as a study of risk prediction using genetic factors. (b) Use recommended keywords in the abstract: genetic or genomic, risk, prediction.                                                                                                                                                            |
| INTRODUCTION                      |     |                                                                                                                                                                                                                                                                                                                              |
| Background and rationale          | 2   | Explain the scientific background and rationale for the prediction study.                                                                                                                                                                                                                                                    |
| Objectives                        | 3   | Specify the study objectives and state the specific model(s) that is/are investigated. State if the study concerns the development of the model(s), a validation effort, or both.                                                                                                                                            |
| METHODS                           |     |                                                                                                                                                                                                                                                                                                                              |
| Study design and setting          | 4*  | Specify the key elements of the study design and describe the setting, locations, and relevant dates, including periods of recruitment, follow-up, and data collection.                                                                                                                                                      |
| Participants                      | 5*  | Describe eligibility criteria for participants, and sources and methods of selection of participants.                                                                                                                                                                                                                        |
| Variables: Definition             | 6*  | Clearly define all participant characteristics, risk factors and outcomes. Clearly define genetic variants using a widely-used nomenclature system.                                                                                                                                                                          |
| Variables: Assessment             | 7*  | (a) Describe sources of data and details of methods of assessment (measurement) for each variable. (b) Give a detailed description of genotyping and other laboratory methods.                                                                                                                                               |
| Variables: Coding                 | 8   | (a) Describe how genetic variants were handled in the analyses. (b) Explain how other quantitative variables were handled in the analyses. If applicable, describe which groupings were chosen, and why.                                                                                                                     |
| Analysis: Risk model construction | 9   | Specify the procedure and data used for the derivation of the risk model. Specify which candidate variables were initially examined or considered for inclusion in models. Include details of any variable selection procedures and other model-building issues. Specify the horizon of risk prediction (e.g., 5-year risk). |
| Analysis: Validation              | 10  | Specify the procedure and data used for the validation of the risk model.                                                                                                                                                                                                                                                    |
| Analysis: Missing data            | 11  | Specify how missing data were handled.                                                                                                                                                                                                                                                                                       |
| Analysis: Statistical methods     | 12  | Specify all measures used for the evaluation of the risk model including, but not limited to, measures of model fit and predictive ability.                                                                                                                                                                                  |
| Analysis: Other                   | 13  | Describe all subgroups, interactions, and exploratory analyses that were examined.                                                                                                                                                                                                                                           |
| RESULTS                           |     |                                                                                                                                                                                                                                                                                                                              |
| Participants                      | 14* | Report the numbers of individuals at each stage of the study. Give reasons for nonparticipation at each stage. Report the number of participants not genotyped, and reasons why they were not genotyped.                                                                                                                     |
| Descriptives: Population          | 15* | Report demographic and clinical characteristics of the study population, including risk factors used in the risk modeling.                                                                                                                                                                                                   |
| Descriptives: Model estimates     | 16  | Report unadjusted associations between the variables in the risk model(s) and the outcome. Report adjusted estimates and their precision from the full risk model(s) for each variable.                                                                                                                                      |
| Risk distributions                | 17* | Report distributions of predicted risks and/or risk scores.                                                                                                                                                                                                                                                                  |
| Assessment                        | 18  | Report measures of model fit and predictive ability, and any other performance measures, if pertinent.                                                                                                                                                                                                                       |
| Validation                        | 19  | Report any validation of the risk model(s).                                                                                                                                                                                                                                                                                  |
| Other analyses                    | 20  | Present results of any subgroup, interaction, or exploratory analyses, whenever pertinent.                                                                                                                                                                                                                                   |
| DISCUSSION                        |     |                                                                                                                                                                                                                                                                                                                              |
| Limitations                       | 21  | Discuss limitations and assumptions of the study, particularly those concerning study design, selection of participants, and measurements and analyses, and discuss their impact on the results of the study.                                                                                                                |
| Interpretation                    | 22  | Give an overall interpretation of results considering objectives, limitations, multiplicity of analyses, results from similar studies, and other relevant evidence.                                                                                                                                                          |
| Generalizability                  | 23  | Discuss the generalizability and, if pertinent, the health care relevance of the study results.                                                                                                                                                                                                                              |
| OTHER                             |     |                                                                                                                                                                                                                                                                                                                              |
| Supplementary information         | 24  | State whether databases for the analyzed data, risk models, and/or protocols are or will become publicly available and if so, how they can be accessed.                                                                                                                                                                      |
| Funding                           | 25  | Give the source of funding and the role of the funders for the present study. State whether there are any conflicts of interest.                                                                                                                                                                                             |

\* Marked items should be reported for every population in the study.  
doi:10.1371/journal.pmed.1000420.t001

\*Obtained from Janssens AC, Ioannidis JP, Bedrosian S, et al. Strengthening the reporting of genetic risk prediction studies (GRIPS): explanation and elaboration. Eur J Clin Invest. 2011;41(9):1010-1035.

Table S2b. Evaluation of studies against the 25-item “Strengthening the Reporting of Genetic Risk Prediction Studies Prediction Studies” (GRIPS) checklist

[illegible]

|                           |   |   |   |   |   |   |   |   |   |   |   |    |    |   |    |    |   |    |    |   |    |    |   |   |   |    |   |
|---------------------------|---|---|---|---|---|---|---|---|---|---|---|----|----|---|----|----|---|----|----|---|----|----|---|---|---|----|---|
| Maas 2016                 |   |   |   |   |   |   |   |   |   |   |   |    |    |   |    |    | * |    |    |   |    |    |   |   |   |    |   |
| Hsieh 2017                |   |   |   |   |   |   |   |   |   |   |   |    |    |   |    |    | * |    |    |   |    |    |   |   |   |    |   |
| Guo 2017                  |   |   |   |   |   |   |   |   |   |   |   |    |    |   |    |    | * |    |    |   |    |    |   |   |   |    |   |
| Shieh 2017                |   |   |   |   |   |   |   |   |   |   |   |    |    |   |    |    | * |    |    |   |    |    |   |   |   |    |   |
| van Veen 2018             |   |   |   |   |   |   |   |   |   |   |   |    |    |   |    |    |   |    |    |   |    |    |   |   |   |    |   |
| No. of items not reported | 7 | 0 | 5 | 5 | 4 | 3 | 8 | 5 | 0 | 7 | 2 | 15 | 14 | 0 | 11 | 17 | 4 | 20 | 11 | 0 | 18 | 15 | 1 | 0 | 9 | 26 | 0 |

White box indicates that the item was reported.

Gray box indicates that the item was not reported.

\* indicates that Single Nucleotide Polymorphism were reported.

\*\* Study provided NRI but not AUC.

Table S3a. Newcastle-Ottawa Quality Assessment Scale (NOS) coding manual for case-control studies\*

## **SELECTION**

### 1) Is the Case Definition Adequate?

- a) Requires some independent validation (e.g. >1 person/record/time/process to extract information, or reference to primary record source such as x-rays or medical/hospital records) ☆
- b) Record linkage (e.g. ICD codes in database) or self-report with no reference to primary record
- c) No description

### 2) Representativeness of the Cases

- a) All eligible cases with outcome of interest over a defined period of time, all cases in a defined catchment area, all cases in a defined hospital or clinic, group of hospitals, health maintenance organisation, or an appropriate sample of those cases (e.g. random sample) ☆
- b) Not satisfying requirements in part (a), or not stated.

### 3) Selection of Controls

This item assesses whether the control series used in the study is derived from the same population as the cases and essentially would have been cases had the outcome been present.

- a) Community controls (i.e. same community as cases and would be cases if had outcome) ☆
- b) Hospital controls, within same community as cases (i.e. not another city) but derived from a hospitalised population
- c) No description

### 4) Definition of Controls

- a) If cases are first occurrence of outcome, then it must explicitly state that controls have no history of this outcome. If cases have new (not necessarily first) occurrence of outcome, then controls with previous occurrences of outcome of interest should not be excluded. ☆
- b) No mention of history of outcome

## **COMPARABILITY**

### 1) Comparability of Cases and Controls on the Basis of the Design or Analysis

- A maximum of 2 stars can be allotted in this category
- Either cases and controls must be matched in the design and/or confounders must be adjusted for in the analysis. Statements of no differences between groups or that differences were not statistically significant are not sufficient for establishing

comparability. Note: If the odds ratio for the exposure of interest is adjusted for the confounders listed, then the groups will be considered to be comparable on each variable used in the adjustment.

- There may be multiple ratings for this item for different categories of exposure (e.g. ever vs. never, current vs. previous or never)

Age = ☆, Other controlled factors = ☆

## **EXPOSURE**

1) Ascertainment of exposure

- a) Secure record (eg surgical records) ☆
- b) Structured interview where blind to case/control status ☆
- c) Interview not blinded to case/control status
- d) Written self-report or medical record only
- e) No description

2) Same method of ascertainment for cases and controls

- a) Yes ☆
- b) No

3) Non-Response rate

- a) Same rate for both groups ☆
- b) Non-respondents described
- c) Rate different and no designation

\*Obtained from GA Wells BS, D O'Connell, J Peterson, V Welch, M Losos, P Tugwell. The Newcastle-Ottawa Scale (NOS) for assessing the quality of nonrandomised studies in meta-analyses. <[http://www.ohri.ca/programs/clinical\\_epidemiology/oxford.asp](http://www.ohri.ca/programs/clinical_epidemiology/oxford.asp)>. Accessed 2018 1 April.

Table S3b. Newcastle-Ottawa Quality Assessment Scale (NOS) of Studies

| Author, year       | Selection |    |    |    | Comparability | Exposure |    |    | Total no. of stars |
|--------------------|-----------|----|----|----|---------------|----------|----|----|--------------------|
|                    | Q1        | Q2 | Q3 | Q4 | Q1            | Q1       | Q2 | Q3 |                    |
| Mealiffe, 2010     | *         | *  | *  | *  | **            | *        | *  |    | 8                  |
| Wacholder, 2010    | *         | *  | *  | *  | *             | *        | *  |    | 7                  |
| Zheng, 2010        | *         | *  | *  | *  | **            | *        | *  |    | 8                  |
| Kaklamani, 2011    | *         | *  |    | *  | **            | *        | *  |    | 7                  |
| Dai, 2012          | *         | *  | *  | *  | **            | *        | *  |    | 8                  |
| Darabi, 2012       |           | *  | *  |    | **            |          | *  |    | 5                  |
| Higginbotham, 2012 | *         | *  | *  | *  | *             | *        | *  |    | 7                  |
| Hüsing, 2012       | *         | *  | *  |    | **            | *        | *  |    | 7                  |
| Sueta, 2012        |           | *  |    |    | **            | *        | *  |    | 5                  |
| Dite, 2013         | *         | *  | *  | *  | *             | *        | *  |    | 7                  |
| Xu, 2013           | *         | *  | *  | *  |               | *        | *  |    | 6                  |
| Jupe, 2014         |           | *  | *  | *  | *             | *        | *  | *  | 7                  |
| Lee, 2014          |           | *  | *  | *  | **            | *        | *  | *  | 8                  |
| Lee, 2015          | *         | *  | *  |    |               | *        | *  |    | 5                  |
| Allman, 2015       |           | *  |    |    | *             |          |    |    | 3                  |
| Vachon, 2015       | *         | *  |    | *  | **            |          | *  |    | 6                  |
| Wu, 2015           |           | *  |    | *  | *             |          | *  |    | 4                  |
| Burnside, 2016     | *         | *  | *  | *  | *             | *        | *  |    | 7                  |
| Dite, 2016         |           | *  | *  | *  | *             | *        | *  |    | 6                  |
| Shieh, 2016        |           | *  |    | *  | **            | *        | *  |    | 6                  |
| Wen, 2016          |           |    |    |    | **            |          |    |    | 2                  |
| Maas, 2016         | *         |    |    | *  | **            | *        |    |    | 5                  |
| Hsieh, 2017        | *         | *  | *  | *  | **            | *        | *  |    | 8                  |
| Guo, 2017          | *         | *  | *  |    | *             |          | *  |    | 5                  |
| Shieh, 2017        | *         |    | *  | *  | **            | *        | *  |    | 7                  |
| van Veen, 2018     | *         |    | *  | *  |               | *        | *  |    | 5                  |

Table S4. Detailed characteristics of studies that evaluated the predictive ability of SNP-enhanced breast cancer risk prediction models

| Author          | Participants with BC | Participants with no BC | Detailed method of incorporating SNPs in model                                                                                                                                                                                                                                                                                                                                                                                                                                           | Loci of SNPs used in model                                                                                                                                                                            |
|-----------------|----------------------|-------------------------|------------------------------------------------------------------------------------------------------------------------------------------------------------------------------------------------------------------------------------------------------------------------------------------------------------------------------------------------------------------------------------------------------------------------------------------------------------------------------------------|-------------------------------------------------------------------------------------------------------------------------------------------------------------------------------------------------------|
| Mealiffe, 2010  | 1,664                | 1,636                   | Mealiffe method - SNP relative score (SNP risk) was the product of adjusted risk values for each SNPs. Risk allele frequencies and published estimates of odds ratio per allele were used in the calculations based on a log-additive risk model                                                                                                                                                                                                                                         | rs2981582, rs3803662, rs889312, rs13387042, rs13281615, rs4415084, rs3817198                                                                                                                          |
| Wacholder, 2010 | 5,590                | 5,998                   | Allele count - In the genetic model, the risky alleles present (0, 1 or 2) were quantified for each individual SNP.                                                                                                                                                                                                                                                                                                                                                                      | rs1045485, rs13281615, rs13387042, rs2981582, rs3803662, rs3817198, rs889312, rs7716600, rs11249433, rs999737                                                                                         |
| Zheng, 2010     | 3,039                | 3,082                   | Risk score - Genetic risk score was created by multiplying regression coefficient derived from a logistic model for each SNP replicated in the study individually                                                                                                                                                                                                                                                                                                                        | rs2046210, rs1219648, rs3817198, rs8051542, rs3803662, rs889312, rs10941679, rs13281615                                                                                                               |
| Kaklamani, 2011 | 354                  | 364                     | Other method - Multiple-SNP analyses used Bayesian hierarchical logistic models using prior distributions for genetic effects.                                                                                                                                                                                                                                                                                                                                                           | rs7206790, rs8047395, rs9939609, rs1477196                                                                                                                                                            |
| Dai, 2012       | 914                  | 967                     | <p>Allele count - 1. Each risk allele/factor treated equally and combined them based on counts of risk alleles/factors</p> <p>Risk score - 2. Risk score calculated with a linear combination of SNP alleles or risk factors weighted by individual odds ratio and grouped into quartiles</p> <p>Modified Gail model - 3. Absolute risk for each woman estimated by modified Gail model and used a multiplicative model to derive genotype relative risk from the allelic odds ratio</p> | rs13387042, rs2307032, rs2180341, rs2046210, rs2981582                                                                                                                                                |
| Darabi, 2012    | 1,566                | 1,527                   | Multiplicative penetrance model                                                                                                                                                                                                                                                                                                                                                                                                                                                          | rs11249433, rs1045485, rs13387042, rs4973768, rs10941679, rs889312, rs2046210, rs13281615, rs1011970, rs2981582, rs2380205, rs10995190, rs704010, rs3817198, rs614367, rs999737, rs3803662, rs6504950 |
|                 | 1,017                | 856                     |                                                                                                                                                                                                                                                                                                                                                                                                                                                                                          |                                                                                                                                                                                                       |
|                 | 1,552                | 1,185                   |                                                                                                                                                                                                                                                                                                                                                                                                                                                                                          |                                                                                                                                                                                                       |



| Higginbotham, 2012 | 599                  | 1,161                   | Other method - The combined effects on BC risk of SNP variant and proliferative disease in the patient's entry biopsy was included in the model as the genetic component.                                                                                                         | well-established BC risk loci: rs1219648, rs11200014, rs2420946, rs2981579, rs1626678, rs1681723, rs740363; Novel loci: rs1626678, rs8046508                                                                                                                                                                                                                     |
|--------------------|----------------------|-------------------------|-----------------------------------------------------------------------------------------------------------------------------------------------------------------------------------------------------------------------------------------------------------------------------------|------------------------------------------------------------------------------------------------------------------------------------------------------------------------------------------------------------------------------------------------------------------------------------------------------------------------------------------------------------------|
| Author             | Participants with BC | Participants with no BC | Detailed method of incorporating SNPs in model                                                                                                                                                                                                                                    | Loci of SNPs used in model                                                                                                                                                                                                                                                                                                                                       |
| Hüsing, 2012       | 6,009                | 7,827                   | Allele count - In the genetic model, the risky alleles present (0, 1 or 2) were quantified for each individual SNP.                                                                                                                                                               | rs2981582, rs3803662, rs889312, rs3817198, rs13281615, rs13387042, rs1045485<br>rs1045485, rs13281615, rs13387042, rs2981582, rs3803662, rs3817198, rs889312, rs11249433, rs999737                                                                                                                                                                               |
|                    |                      |                         | Log-additive model - 18 SNPs: model obtained by construction- included SNPs into a multiple log-additive model with individually weighted per-allele effects for each SNP                                                                                                         | rs11249433, rs1045485, rs13387042, rs4973768, rs10069690, rs10941679, rs889312, rs1562430, rs865686, rs2380205, rs10995190, rs1250003, rs2981582, rs614367, rs999737, rs3803662, rs6504950                                                                                                                                                                       |
|                    |                      |                         | Allele count - In the genetic model, the risky alleles present (0, 1 or 2) were quantified for each individual SNP.                                                                                                                                                               | rs11249433, rs10931936, rs1045485, rs13387042, rs4973768, rs10069690, rs4415084, rs10941679, rs889312, rs2180341, rs9383935, rs3757318, rs9383938, rs2046210, rs13281615, rs1562430, rs1011970, rs865686, rs2380205, rs10995190, rs16917302, rs1250003, rs3750817, rs2981582, rs3817198, rs909116, rs614367, rs999737, rs3803662, rs2075555, rs6504950, rs311499 |
| Sueta, 2012        | 697                  | 1,394                   | Risk score - A PRS was created to measure the cumulative effect of multiple genetic risk variants                                                                                                                                                                                 | rs2981579, rs3803662, rs2046210, rs13281615, rs4973768, rs38137198, rs10931936                                                                                                                                                                                                                                                                                   |
| Dite, 2013         | 962                  | 463                     | Mealiffe method - Using approach in Mealiffe 2010, SNP relative score (SNP risk) was the product of adjusted risk values for each SNPs. Risk allele frequencies and published estimates of odds ratio per allele were used in the calculations based on a log-additive risk model | rs2981582, rs3803662, rs889312, rs13387042, rs13281615, rs4415084, rs3817198                                                                                                                                                                                                                                                                                     |
| Xu, 2013           | 298                  | 612                     | Allele count - In the genetic model, the risky alleles present (0, 1 or 2) were quantified for each individual SNP.                                                                                                                                                               | rs13387042, rs889312, rs2180341, rs13281615, rs10736303, rs2981582, rs3817198, rs999737, rs3803662                                                                                                                                                                                                                                                               |

|              |       |        |                                                                                                                                                                                                                                                                                   |                                                                                                                                                                                                                                                                                                                                                                                                                                                                                                                                                                                                                                                                                                                                                                                                                                                                                     |
|--------------|-------|--------|-----------------------------------------------------------------------------------------------------------------------------------------------------------------------------------------------------------------------------------------------------------------------------------|-------------------------------------------------------------------------------------------------------------------------------------------------------------------------------------------------------------------------------------------------------------------------------------------------------------------------------------------------------------------------------------------------------------------------------------------------------------------------------------------------------------------------------------------------------------------------------------------------------------------------------------------------------------------------------------------------------------------------------------------------------------------------------------------------------------------------------------------------------------------------------------|
| Jupe, 2014   | 1,671 | 3,351  | Other method - SNPs are weighted individually and/or by interaction with a specific age stratum in the absence/presence of an affected first-degree family member, in a polyfactorial risk model.                                                                                 | rs34915260 (Promoter PIII), rs34915260 (Exon 1), rs2252757, rs4680, rs1799998, rs10046, rs4646903, rs1800440, rs10012, rs1051740, rs17655, rs2077647, rs2000993, rs3842752, rs3745535, rs3136229, rs4796033, rs1799725, rs763110, rs7975232, rs2228000, rs3218536                                                                                                                                                                                                                                                                                                                                                                                                                                                                                                                                                                                                                   |
| Lee, 2014    | 411   | 1,212  | Sum of product method - PRS was calculated by obtaining the product of number of risk alleles that the individual carries (0, 1, 2) and estimated log odds ratio for the association between SNP and BC, and then summing information from all SNPs.                              | rs616488, rs11552449, rs11249433, rs4849887, rs2016394, rs13387042, rs16857609, rs6762644, rs4973768, rs12493607, rs9790517, rs6828523, rs4415084, rs10941679, rs889312, rs10472076, rs1432679, rs11242675, rs2180341, rs204247, rs17529111, rs3757318, rs2046210, rs720475, rs9693444, rs13281615, rs1562430, rs1011970, rs10759243, rs865686, rs10822013, rs10995190, rs704010, rs1219648, rs2981582, rs3817198, rs3903072, rs11820646, rs12422552, rs10771399, rs17356907, rs2236007, rs941764, rs4784227, rs3112612, rs13329835, rs17817449, rs527616, rs1436904, rs3760982, rs2823093                                                                                                                                                                                                                                                                                          |
| Lee, 2015    | 680   | 23,481 | Sum of product method - PRS was calculated by obtaining the product of number of risk alleles that the individual carries (0, 1, 2) and estimated log odds ratio for the association between SNP and BC, and then summing information from all SNPs.                              | rs12022378, rs11249433, rs616488, rs4245739, rs6678914, rs13387042, rs16857609, rs1045485, rs4849887, rs2016394, rs1550623, rs12710696, rs4973768, rs6762644, rs12493607, rs9790517, rs6828523, rs7726159, rs10069690, rs2736108, rs10941679, rs889312, rs10472076, rs1353747, rs1432679, rs12662670, rs2046210, rs11242675, rs204247, rs17529111, rs720475, rs13281615, rs9693444, rs6472903, rs2943559, rs11780156, rs10759243, rs865686, rs1011970, rs2981579, rs11199914, rs7072776, rs11814448, rs2380205, rs10995190, rs704010, rs7904519, rs554219, rs3817198, rs3903072, rs11820646, rs10771399, rs1292011, rs12422552, rs17356907, rs11571833, rs2588809, rs999737, rs2236007, rs941764, rs3803662, rs17817449, rs13329835, rs11075995, rs6504950, rs527616, rs1436904, rs8170, rs2363956, rs4808801, rs3760982, rs2823093, rs17879961, rs132390, rs6001930                |
| Allman, 2015 | 416   | 7,005  | Mealiffe method - Using approach in Mealiffe 2010, SNP relative score (SNP risk) was the product of adjusted risk values for each SNPs. Risk allele frequencies and published estimates of odds ratio per allele were used in the calculations based on a log-additive risk model | African American: rs11249433, rs4245739, rs616488, rs6678914, rs1045485, rs12710696, rs13387042, rs1550623, rs16857609, rs2016394, rs4849887, rs12493607, rs4973768, rs6762644, rs6828523, rs9790517, rs10069690, rs10472076, rs10941679, rs1353747, rs1432679, rs4415084, rs889312, rs11242675, rs17529111, rs204247, rs2046210, rs3757318, rs720475, rs11780156, rs13281615, rs2943559, rs6472903, rs9693444, rs1011970, rs10759243, rs865686, rs10995190, rs11199914, rs11814448, rs2380205, rs2981579, rs2981582, rs704010, rs7072776, rs7904519, rs11820646, rs3817198, rs3903072, rs554219, rs614367, rs75915166, rs10771399, rs12422552, rs1292011, rs17356907, rs11571833, rs2236007, rs2588809, rs941764, rs999737, rs11075995, rs13329835, rs17817449, rs3803662, rs6504950, rs1436904, rs527616, rs3760982, rs4808801, rs8170, rs2284378, rs2823093, rs132390, rs6001930 |

|                | 147                  | 3,201                   |                                                                                                                                                                                                                                                      | <p>Hispanics: rs11249433, rs11552449, rs4245739, rs616488, rs6678914, rs12710696, rs13387042, rs1550623, rs16857609, rs2016394, rs4849887, rs12493607, rs4973768, rs6762644, rs6828523, rs7696175, rs9790517, rs10069690, rs10472076, rs10941679, rs1353747, rs1432679, rs2067980, rs889312, rs11242675, rs140068132, rs204247, rs2046210, rs2180341, rs17157903, rs720475, rs11780156, rs13281615, rs2943559, rs6472903, rs9693444, rs1011970, rs10759243, rs865686, rs10995190, rs11199914, rs11814448, rs2380205, rs2981579, rs2981582, rs704010, rs7072776, rs11820646, rs3817198, rs3903072, rs10771399, rs12422552, rs1292011, rs17356907, rs2236007, rs2588809, rs941764, rs999737, rs11075995, rs13329835, rs17817449, rs3803662, rs6504950, rs1436904, rs527616, rs2363956, rs3760982, rs4808801, rs8170, rs2823093, rs6001930</p>                                                                                                    |
|----------------|----------------------|-------------------------|------------------------------------------------------------------------------------------------------------------------------------------------------------------------------------------------------------------------------------------------------|------------------------------------------------------------------------------------------------------------------------------------------------------------------------------------------------------------------------------------------------------------------------------------------------------------------------------------------------------------------------------------------------------------------------------------------------------------------------------------------------------------------------------------------------------------------------------------------------------------------------------------------------------------------------------------------------------------------------------------------------------------------------------------------------------------------------------------------------------------------------------------------------------------------------------------------------|
| Author         | Participants with BC | Participants with no BC | Detailed method of incorporating SNPs in model                                                                                                                                                                                                       | Loci of SNPs used in model                                                                                                                                                                                                                                                                                                                                                                                                                                                                                                                                                                                                                                                                                                                                                                                                                                                                                                                     |
| Vachon, 2015   | 334                  | 334                     | Sum of product method - PRS was calculated by obtaining the product of number of risk alleles that the individual carries (0, 1, 2) and estimated log odds ratio for the association between SNP and BC, and then summing information from all SNPs. | <p>rs616488, rs11552449 (proxy: rs3671936), rs11249433, rs6678914, rs4245739, rs12710696, rs4849887, rs2016394, rs1550623, rs1045485, rs13387042, rs16857609, rs6762644, rs4973768, rs12493607, rs9790517, rs6828523, rs10069690, rs2736108, rs10941679, rs889312, rs10472076, rs1353747, rs1432679, rs11242675, rs204247, rs17529111 (proxy: rs17530068), rs3757318, rs2046210, rs720475, rs9693444, rs6472903, rs2943559, rs13281615, rs11780156, rs1011970, rs10759243, rs865686, rs2380205, rs7072776, rs11814448, rs10995190, rs704010, rs7904519, rs11199914, rs2981579, rs2981582, rs3817198, rs3903072, rs614367, rs554219, rs11820646, rs75915166, rs12422552, rs10771399, rs17356907, rs1292011, rs11571833, rs2236007, rs2588809, rs999737, rs941764, rs3803662, rs17817449, rs11075995, rs13329835, rs6504950, rs527616, rs1436904, rs8170, rs2363956, rs4808801, rs3760982, rs2823093, rs132390, rs6001930 (proxy: rs6001913)</p> |
| Wu, 2015       | 373                  | 395                     | Allele count - In the genetic model, the risky alleles present (0, 1 or 2) were quantified for each individual SNP.                                                                                                                                  | rs1045485, rs13281615, rs13387042, rs2981582, rs3803662, rs3817198, rs889312, rs7716600, rs11249433, rs999737                                                                                                                                                                                                                                                                                                                                                                                                                                                                                                                                                                                                                                                                                                                                                                                                                                  |
| Wen, 2016      | 11,905               | 11,662                  | Sum of product method - PRS was calculated by obtaining the product of number of risk alleles that the individual carries (0, 1, 2) and estimated log odds ratio for the association between SNP and BC, and then summing information from all SNPs. | <p>rs616488, rs11249433, rs4951011, rs12710696, rs4849887, rs10931936, rs13387042, rs16857609, rs4973768, rs12493607, rs6828523, rs10069690, rs10941679, rs889312, rs10474352, rs1432679, rs9485372, rs2046210, rs9693444, rs6472903, rs1562430, rs1011970, rs10759243, rs10822013, rs704010, rs11199914, rs2981579, rs909116, rs614367, rs7107217, rs12422552, rs10771399, rs17356907, rs1292011, rs2236007, rs941764, rs2290203, rs3803662, rs4784227, rs11075995, rs527616, rs2363956, rs4808801, rs12628403</p>                                                                                                                                                                                                                                                                                                                                                                                                                            |
| Burnside, 2016 | 373                  | 395                     | Allele count - In the genetic model, the risky alleles present (0, 1 or 2) were quantified for each individual SNP.                                                                                                                                  | rs1045485, rs13281615, rs13387042, rs2981582, rs3803662, rs3817198, rs889312, rs10941679, rs999737, rs11249433                                                                                                                                                                                                                                                                                                                                                                                                                                                                                                                                                                                                                                                                                                                                                                                                                                 |

| Dite, 2016  | 405                  | 750                     | Mealiffe method - SNP relative score (SNP risk) was the product of adjusted risk values for each SNPs. Risk allele frequencies and published estimates of odds ratio per allele were used in the calculations based on a log-additive risk model     | rs616488, rs11552449, rs11249433, rs6678914, rs4245739, rs12710696, rs4849887, rs2016394, rs1550623, rs1045485, rs13387042, rs16857609, rs6762644, rs4973768, rs12493607, rs9790517, rs6828523, rs10069690, rs7726159, rs2736108, rs10941679, rs889312, rs10472076, rs1353747, rs1432679, rs11242675, rs204247, rs17529111, rs12662670, rs2046210, rs720475, rs9693444, rs6472903, rs2943559, rs13281615, rs11780156, rs1011970, rs10759243, rs865686, rs2380205, rs7072776, rs11814448, rs10995190, rs704010, rs7904519, rs11199914, rs2981579, rs3817198, rs3903072, rs78540526, rs554219, rs75915166, rs11820646, rs12422552, rs10771399, rs17356907, rs1292011, rs11571833, rs2236007, rs2588809, rs999737, rs941764, rs3803662, rs17817449, rs11075995, rs13329835, rs6504950, rs527616, rs1436904, rs8170, rs2363956, rs4808801, rs3760982, rs2823093, rs17879961, rs132390, rs6001930                                                                                                                                                                                                                     |
|-------------|----------------------|-------------------------|------------------------------------------------------------------------------------------------------------------------------------------------------------------------------------------------------------------------------------------------------|------------------------------------------------------------------------------------------------------------------------------------------------------------------------------------------------------------------------------------------------------------------------------------------------------------------------------------------------------------------------------------------------------------------------------------------------------------------------------------------------------------------------------------------------------------------------------------------------------------------------------------------------------------------------------------------------------------------------------------------------------------------------------------------------------------------------------------------------------------------------------------------------------------------------------------------------------------------------------------------------------------------------------------------------------------------------------------------------------------------|
| Shieh, 2016 | 471                  | 460                     | Bayesian method - PRS was calculated using allele frequencies and odds ratios from Caucasian population, using a Bayesian approach, as the composite likelihood ratio representing the individual effects of each SNP                                | rs10069690, rs1011970, rs10472076, rs10474352, rs10759243, rs10771399, rs10822013, rs10941679, rs10995190, rs11075995, rs11199914, rs11242675, rs11249433, rs11552449, rs11571833, rs11780156, rs11814448, rs11820646, rs12422552, rs12493607, rs12710696, rs1292011, rs132390, rs13281615, rs13329835, rs13387042, rs1353747, rs140068132, rs1432679, rs1436904, rs1550623, rs1562430, rs16857609, rs17356907, rs17530068, rs17817449, rs17879961, rs204247, rs2046210, rs2236007, rs2284378, rs2290203, rs2380205, rs2392780, rs2588809, rs2736108, rs2823093, rs2943559, rs2981579, rs3757318, rs3760982, rs3803662, rs3817198, rs3822625, rs3903072, rs4245739, rs4415084, rs4808801, rs4849887, rs4951011, rs4973768, rs527616, rs554219, rs6001930, rs614367, rs616488, rs6472903, rs6504950, rs6678914, rs6762644, rs6828523, rs704010, rs7072776, rs720475, rs75915166, rs7726354, rs7904519, rs8170, rs865686, rs889312, rs9383938, rs941764, rs9485372, rs9693444, rs9790517, rs999737                                                                                                                 |
| Author      | Participants with BC | Participants with no BC | Detailed method of incorporating SNPs in model                                                                                                                                                                                                       | Loci of SNPs used in model                                                                                                                                                                                                                                                                                                                                                                                                                                                                                                                                                                                                                                                                                                                                                                                                                                                                                                                                                                                                                                                                                       |
| Maas, 2016  | 17,171               | 19,862                  | Sum of product method - PRS was calculated by obtaining the product of number of risk alleles that the individual carries (0, 1, 2) and estimated log odds ratio for the association between SNP and BC, and then summing information from all SNPs. | 24 SNPs genotyped in BPC3: rs11249433, rs1045485, rs13387042, rs4973768, rs10069690, rs10941679, rs889312, rs17530068, rs2046210, rs1562430, rs1011970, rs865686, rs2380205, rs10995190, rs1250003, rs2981582, rs909116, rs614367, rs10483813, rs3803662, rs6504950, rs8170, rs2284378, rs999737; 68 SNPs: rs75915166, rs554219, rs2736108, rs2588809, rs10759243, rs11199914, rs7072776, rs11814448, rs16857609, rs11552449, rs12662670, rs10771399, rs1292011, rs2363956, rs2823093, rs17879961, rs616488, rs4849887, rs2016394, rs1550623, rs6762644, rs12493607, rs9790517, rs6828523, rs10472076, rs1353747, rs1432679, rs11242675, rs204247, rs720475, rs9693444, rs6472903, rs2943559, rs11780156, rs7904519, rs11820646, rs12422552, rs17356907, rs11571833, rs2236007, rs941764, rs17817449, rs13329835, rs527616, rs1436904, rs4808801, rs3760982, rs132390, rs6001930, rs4245739, rs6678914, rs12710696, rs11075995, rs12405132, rs12048493, rs72755295, rs6796502, rs13162653, rs2012709, rs7707921, rs9257408, rs4593472, rs13365225, rs13267382, rs11627032, chr17:29230520:D, rs745570, rs6507583 |
| Hsieh, 2017 | 446                  | 514                     | Sum of product method - PRS was calculated by obtaining the product of number of risk alleles that                                                                                                                                                   | rs2981579, rs3750817, rs1219648, rs2981582, rs981782, rs889312, rs1686165, rs3803662, rs4784227, rs2046210, rs10822013, rs3784099, rs13393577                                                                                                                                                                                                                                                                                                                                                                                                                                                                                                                                                                                                                                                                                                                                                                                                                                                                                                                                                                    |

|                                                                                      |     |       |                                                                                                                                                                                                                                                           |                                                                                                                                                                                                                                                                                                                                                                                                                                                                                                                                                                                                                                                                                                                                                                                                                                                                                                                                                                                                  |
|--------------------------------------------------------------------------------------|-----|-------|-----------------------------------------------------------------------------------------------------------------------------------------------------------------------------------------------------------------------------------------------------------|--------------------------------------------------------------------------------------------------------------------------------------------------------------------------------------------------------------------------------------------------------------------------------------------------------------------------------------------------------------------------------------------------------------------------------------------------------------------------------------------------------------------------------------------------------------------------------------------------------------------------------------------------------------------------------------------------------------------------------------------------------------------------------------------------------------------------------------------------------------------------------------------------------------------------------------------------------------------------------------------------|
|                                                                                      |     |       | the individual carries (0, 1, 2) and estimated log odds ratio for the association between SNP and BC, and then summing information from all SNPs.                                                                                                         |                                                                                                                                                                                                                                                                                                                                                                                                                                                                                                                                                                                                                                                                                                                                                                                                                                                                                                                                                                                                  |
| Guo, 2017                                                                            | 103 | 303   | Other method - Co-dominant model, dominant model and recessive model of risk alleles were established and if showed significant association with risk, were included in the multivariate binary logistic regression analyses with the other risk factors. | rs3803662, rs2046210, rs4784227, rs4973768                                                                                                                                                                                                                                                                                                                                                                                                                                                                                                                                                                                                                                                                                                                                                                                                                                                                                                                                                       |
|                                                                                      | 150 | 602   |                                                                                                                                                                                                                                                           | rs2046210, rs4784227                                                                                                                                                                                                                                                                                                                                                                                                                                                                                                                                                                                                                                                                                                                                                                                                                                                                                                                                                                             |
| Shieh, 2017                                                                          | 110 | 214   | Bayesian method - PRS was calculated using allele frequencies and odds ratios from Caucasian population, using a Bayesian approach, as the composite likelihood ratio representing the individual effects of each SNP                                     | rs10069690, rs1011970, rs10472076, rs10474352, rs10759243, rs10771399, rs10822013, rs10941679, rs10995190, rs11075995, rs11199914, rs11242675, rs11249433, rs11552449, rs11571833, rs11780156, rs11814448, rs11820646, rs12422552, rs12493607, rs12710696, rs1292011, rs132390, rs13281615, rs13329835, rs13387042, rs1353747, rs140068132, rs1432679, rs1436904, rs1550623, rs1562430, rs16857609, rs17356907, rs17530068, rs17817449, rs17879961, rs204247, rs2046210, rs2236007, rs2284378, rs2290203, rs2380205, rs2392780, rs2588809, rs2736108, rs2823093, rs2943559, rs2981579, rs3757318, rs3760982, rs3803662, rs3817198, rs3822625, rs3903072, rs4245739, rs4415084, rs4808801, rs4849887, rs4951011, rs4973768, rs527616, rs554219, rs6001930, rs614367, rs616488, rs6472903, rs6504950, rs6678914, rs6762644, rs6828523, rs704010, rs7072776, rs720475, rs75915166, rs7726354, rs7904519, rs8170, rs865686, rs889312, rs9383938, rs941764, rs9485372, rs9693444, rs9790517, rs999737 |
| van Veen, 2018                                                                       | 466 | 8,897 | Risk score - PRS was calculated by multiplying the per-allele odds ratio for each SNP and normalizing the risk by the average risk expected in the population using published minor allele frequencies.                                                   | rs614367, rs704010, rs713588, rs889312, rs909116, rs1011970, rs1156287, rs1562430, rs2981579, rs3757318, rs3803662, rs4973768, rs8009944, rs9790879, rs10995190, rs11249433, rs13387042, rs10931936                                                                                                                                                                                                                                                                                                                                                                                                                                                                                                                                                                                                                                                                                                                                                                                              |
| BC = Breast cancer, SNP = Single nucleotide polymorphism, PRS = Polygenic risk score |     |       |                                                                                                                                                                                                                                                           |                                                                                                                                                                                                                                                                                                                                                                                                                                                                                                                                                                                                                                                                                                                                                                                                                                                                                                                                                                                                  |

Table S5. Improvement in AUC in SNP-enhanced breast cancer risk prediction model of, grouped by baseline model

| Baseline model                            | No. of risk factors | No. of SNPs | Method of incorporating SNPs in model | AUC of baseline model (95% CI) | AUC of SNP-enhanced model (95% CI) | Increase in AUC (95% CI) | Author        | Year |
|-------------------------------------------|---------------------|-------------|---------------------------------------|--------------------------------|------------------------------------|--------------------------|---------------|------|
| (A) Studies using BRCAT as baseline model |                     |             |                                       |                                |                                    |                          |               |      |
| BCRAT (5-6 risk factors of BCRAT)         | 5                   | 7           | Mealiffe method                       | 0.58 (0.55, 0.61)              | overall: 0.61 (0.58, 0.64)         | 0.03                     | Dite          | 2013 |
|                                           | 5*                  | 77          | Mealiffe method                       | 0.64 (0.60, 0.68)              | 0.67 (0.63, 0.70)                  | 0.03                     | Dite          | 2016 |
|                                           | 6                   | 7           | Mealiffe method                       | 0.557 (0.547, 0.575)           | 0.594 (0.575, 0.612)               | 0.037 (0.025, 0.051)     | Mealiffe      | 2010 |
|                                           | 6                   | 9           | Other method                          | 0.573                          | 0.601                              | 0.028                    | Higginbottham | 2012 |
|                                           | 6                   | 75          | Mealiffe method                       | 0.56 (0.53, 0.59)              | 0.59 (0.56, 0.61)                  | 0.03                     | Allman        | 2015 |
|                                           | 6                   | 71          | Mealiffe method                       | 0.55 (0.51, 0.60)              | 0.61 (0.56, 0.66)                  | 0.06                     | Allman        | 2015 |
|                                           | 6 + 2               | 75          | Sum of product method                 | 0.660 (0.640, 0.680)           | 0.680 (0.660, 0.690)               | 0.020                    | Lee           | 2015 |
| Partial BCRAT (2-4 risk factors of BCRAT) | 2                   | 5           | Risk score                            | 0.638                          | Risk score: 0.649 (0.631, 0.667)   | 0.011                    | Dai           | 2012 |
|                                           | 4                   | 10          | Allele count                          | 0.580                          | 0.618                              | 0.038                    | Wacholder     | 2010 |
|                                           | 4                   | 9           | Allele count                          | 0.560                          | 0.612                              | 0.052                    | Xu            | 2013 |
|                                           | 4                   | 22          | Other method                          | 0.580                          | 35-39 years: 0.69                  | 0.11                     | Jupe          | 2014 |
| Partial BCRAT + additional risk factors   | 2+2                 | 18          | Multiplicative penetrance model       | 0.548 (0.527, 0.568)           | 0.615 (0.595, 0.634)               | 0.067                    | Darabi        | 2012 |
|                                           | 2+3                 | 13          | Sum of product method                 | 0.634                          | 0.665                              | 0.031                    | Hsieh         | 2017 |
|                                           | 4+2                 | 9           | Other method                          | 0.588                          | 0.615                              | 0.027                    | Higginbottham | 2012 |
|                                           | 2+5                 | 18          | Multiplicative penetrance model       | 0.604 (0.579, 0.630)           | 0.619 (0.594, 0.644)               | 0.015                    | Darabi        | 2012 |
|                                           | 2+5                 | 8           | Risk score                            | 0.618                          | c-statistic: 0.630                 | c-statistic: 0.012       | Zheng         | 2010 |
|                                           | 3+5                 | 7           | Risk score                            | 0.665                          | c-statistic: 0.693                 | c-statistic: 0.028       | Sueta         | 2012 |
|                                           | 3+7                 | 10          | Allele count                          | 0.597                          | 0.638                              | 0.041                    | Wu            | 2015 |



32

0.604 (0.588, 0.621)

0.040

---

\*Number of risk factors assumed to be all the risk factors used in the stated baseline model, excluding risk factors that were stated to be missing/no information.



Table S6. Risk factors included in the various breast cancer risk prediction models

| Risk Factor                                           | BCRAT | BCSC<br>v1.0 | BCSC<br>v2.0 | BRCAPRO <sup>a</sup> | IBIS <sup>a</sup> | BOADICEA |
|-------------------------------------------------------|-------|--------------|--------------|----------------------|-------------------|----------|
| <b>Personal Information</b>                           |       |              |              |                      |                   |          |
| Age                                                   | Yes   | Yes          | Yes          | Yes                  | Yes               | Yes      |
| BMI                                                   | No    | No           | No           | No                   | Yes               | No       |
| Race                                                  | Yes   | Yes          | Yes          | Yes                  | No                | No       |
| Height                                                | No    | No           | No           | No                   | Yes               | No       |
| <b>Hormonal and Reproductive Factors</b>              |       |              |              |                      |                   |          |
| Age at menarche                                       | Yes   | No           | No           | No                   | Yes               | No       |
| Age at first live birth                               | Yes   | No           | No           | No                   | Yes               | No       |
| Age at menopause                                      | No    | No           | No           | No                   | Yes               | No       |
| Parity                                                | No    | No           | No           | No                   | Yes               | No       |
| <b>Personal history of breast disease</b>             |       |              |              |                      |                   |          |
| Breast biopsies                                       | Yes   | Yes          | Yes          | No                   | No                | No       |
| Atypical ductal hyperplasia                           | Yes   | No           | No           | No                   | Yes               | No       |
| Lobular carcinoma in situ                             | Yes   | No           | No           | No                   | Yes               | No       |
| Breast density                                        | No    | Yes          | Yes          | No                   | No                | No       |
| Benign breast disease                                 | No    | No           | Yes          | No                   | No                | No       |
| <b>Family History of breast and/or ovarian cancer</b> |       |              |              |                      |                   |          |
| First-degree relatives with breast cancer             | Yes   | Yes          | Yes          | Yes                  | Yes               | Yes      |
| Second-degree relatives* with breast cancer           | No    | No           | No           | Yes                  | Yes               | Yes      |
| Age of onset of breast cancer in a relative           | No    | No           | No           | Yes                  | Yes               | Yes      |
| Bilateral breast cancer in a relative                 | No    | No           | No           | Yes                  | Yes               | Yes      |
| Ovarian cancer in a relative                          | No    | No           | No           | Yes                  | Yes               | Yes      |

BRCAT = Breast Cancer Risk Assessment Tool (6); BCSC = Breast Cancer Surveillance Consortium, v1.0 (11), v2.0 (12); BRCAPRO (8); IBIS = International Breast Intervention Study (7); BOADICEA = Breast and Ovarian Analysis of Disease Incidence and Carrier Estimation Algorithm (9,10); BMI = Body Mass Index

This table was adapted from Amir et al (81).

<sup>a</sup> BRCAPRO was designed as a pretest for BRCA mutation (77) while IBIS was designed for use in high-risk population (66, 69).

\*Both maternal and paternal relatives are included.

Figure S7: Meta-analysis of the overall area under the curve (AUC) for SNP-enhanced breast cancer risk prediction models by increasing baseline AUC and baseline model group (a) BCRAT (5-6 risk factors of BCRAT) (b) Partial BCRAT (2-4 risk factors of BCRAT) (c) Partial BCRAT + additional risk factors (d) BCSC (e) IBIS (f) Other models

A forest plot for the overall AUC and increasing baseline AUC by baseline model group is shown. The 95% CIs are denoted by the black tails originating from the black square, which is the point estimate for overall AUC in each model. The combined overall AUC estimate within each baseline model group is represented by the black diamond, where the diamond width corresponds to the 95% CI bounds. Heterogeneity was assessed using  $I^2$ -statistic to determine the extent of variation between study population estimates. Random-effects model is applied for all model groups except BCSC ( $I^2$ -statistic < 50%).

Abbreviations used in Figure S7:

AUC = Area under receiver operating characteristics curve, CI = 95% Confidence Interval, SNP = Single Nucleotide Polymorphisms, BCRAT = Breast Cancer Risk Assessment Tool (6), BCSC = Breast Cancer Surveillance Consortium (11,12), BOADICEA = Breast and Ovarian Analysis of Disease Incidence and Carrier Estimation Algorithm (9,10), BRCAPRO (8), IBIS = International Breast Intervention Study (7)

Figure S7

## (S7a) BCRAT (5-6 risk factors of BCRAT)

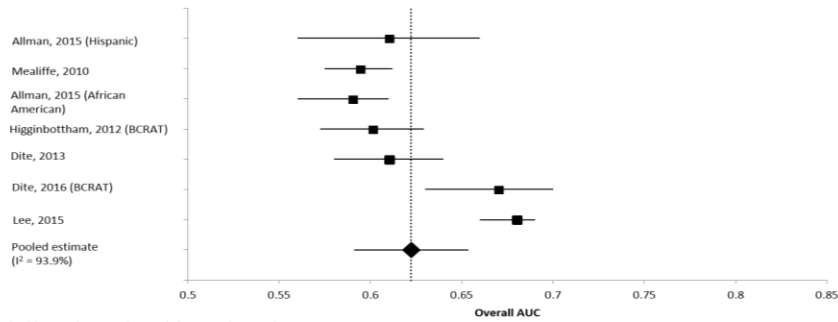

## (S7b) Partial BCRAT (2-4 risk factors of BCRAT)

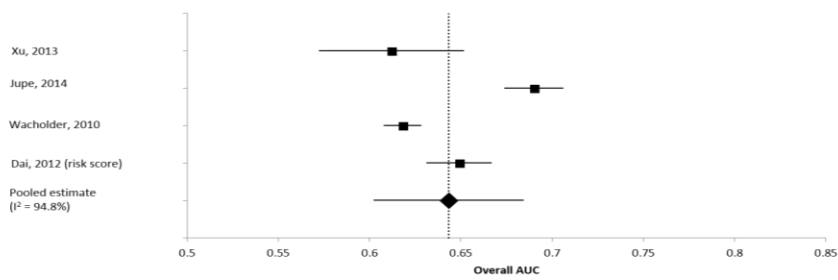

## (S7c) Partial BCRAT + additional risk factors

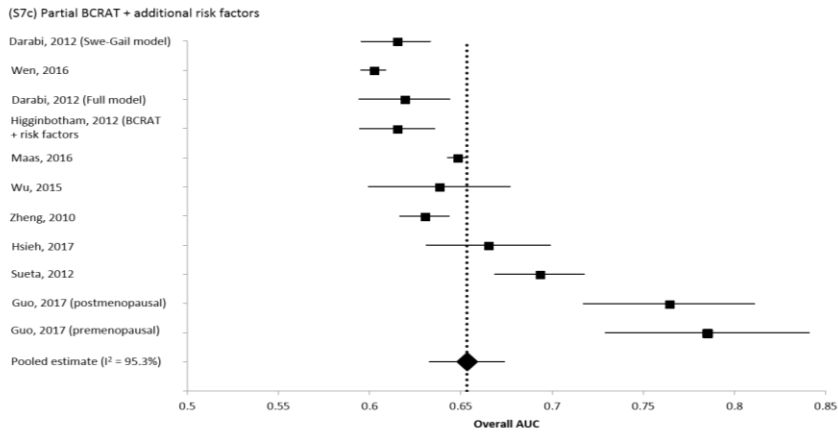

## (S7d) BCSC

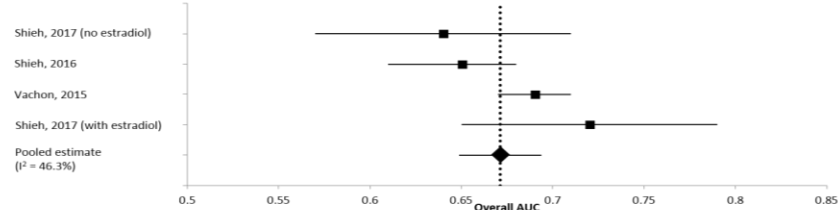

## (S7e) IBIS

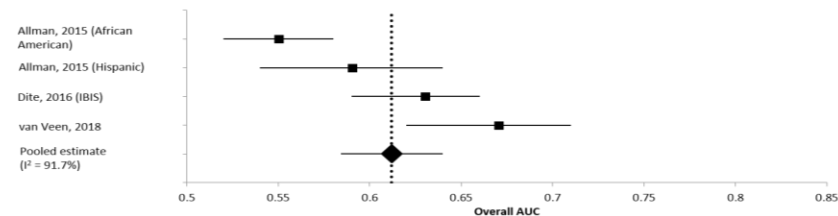

## (S7f) Other models

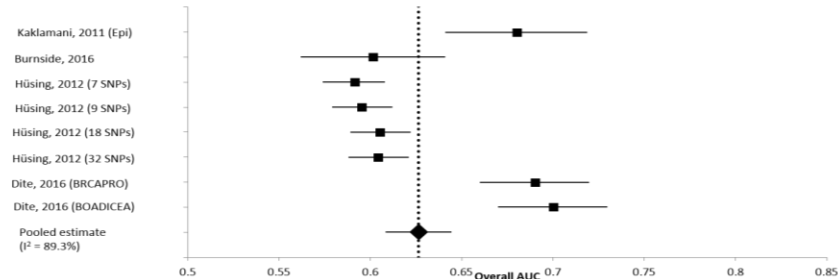

Figure S8: Summary of pooled estimates obtained from meta-analysis, grouped by similar baseline model

A summary of the pooled overall AUC estimates within each baseline model group is shown. The overall AUC estimate within each group is represented by the black diamond, where the diamond width corresponds to the 95% CI bounds.

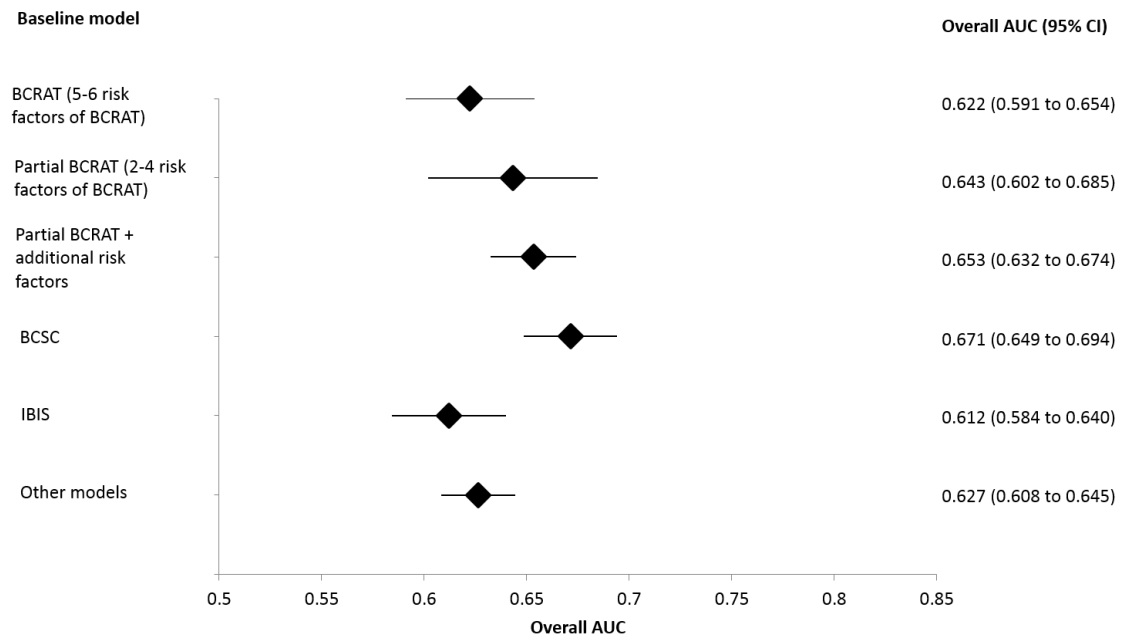

Supplement: 10559965epi180810-sup-205429_2_supp_5172250_p1hht9.pdf [file 10559965epi180810-sup-205429_2_supp_5172250_p1hht9.pdf]
